# Supplementary material for: What we do on social media! Social representations of schoolchildren's activities on electronic communication platforms
Source: PubMed Central journal article supplement (PMC7452393; doi:10.1016/j.heliyon.2020.e04584), 2020-08-20
Supplement: mmc1.pdf [file mmc1.pdf]

## Appendix

### SOCIAL NETWORKING MEDIA USAGE QUESTIONNAIRE (SNMUQ)

#### STUDENT'S QUESTIONNAIRE

Dear Student,

This research instrument aims to evaluate the use of social networking websites use among school children. Kindly respond to this questionnaire as honest as possible.

**Your signature and Date (If you agree to participate in this study):** \_\_\_\_\_

**SCHOOL NAME** \_\_\_\_\_

**STUDENT NUMBER (9 digits):** \_\_\_\_\_

**CLASS (e.g. 3A)** \_\_\_\_\_

**GENDER (✓)**

Boy ( ) Girl ( )

**DATE OF BIRTH:** \_\_\_\_\_

**Age:** \_\_\_\_\_

**Tribe:** \_\_\_\_\_

#### Home Background

I live with my father and mother ( ) I live with my father only ( ) I live with my mother only ( )

I live with my Grandmother ( ) I live with my Aunty ( ) I live with my Grandfather ( )

1. What social media websites do you use?

1. Facebook ( ) 2. LinkedIn ( ) 3. Twitter ( ) 4. 2go ( ) 5. Youtube ( ) 6. Any other not listed: \_\_\_\_\_

2. How many minutes/hours do you spend on the selected social media sites each day \_\_\_\_\_?

3. Do you have a mobile phone? \_\_\_\_\_ If Yes, which line and network(MTN, GLO, AIRTEL etc) \_\_\_\_\_

4. Do you connect to connect to the selected social media with your phone? Yes ( ) No ( )

5. Is your parent/guardian aware you connect to social media via your phone?

6. What name did you use to open your facebook/2go account? \_\_\_\_\_

7. In which year did you open facebook/2go account? \_\_\_\_\_

8. Who assisted you to open facebook/2go account? \_\_\_\_\_

9. Have you abuse anyone that anyone that offended you before using the facebook/2go? Yes ( ) No ( )

If yes, how did it

happen? \_\_\_\_\_

\_\_\_\_\_

\_\_\_\_\_

\_\_\_\_\_

\_\_\_\_\_

10. Do watch 'mojo' i.e. sex films on your mobile phone when connected to the Internet? Yes ( ) No

If yes, mention titles of the films \_\_\_\_\_

11. Has your at parents anytime restricted your use of social media usage? \_\_\_\_\_

---

---

---

12. Which of your teachers have counsel you on the use of social media in the past? \_\_\_\_\_

---

---

---

13. If someone does not respond to your friendship request on the facebook/2go, what will you do to him/her?

---

---

---

---

---

---

14. Who taught you to use facebook/2go? \_\_\_\_\_
